# Supplementary material for: Evolution of foot-and-mouth disease virus intra-sample sequence diversity during serial transmission in bovine hosts
Source: PubMed Central journal article supplement (PMC3630017; doi:10.1186/1297-9716-44-12), 2013-03-01

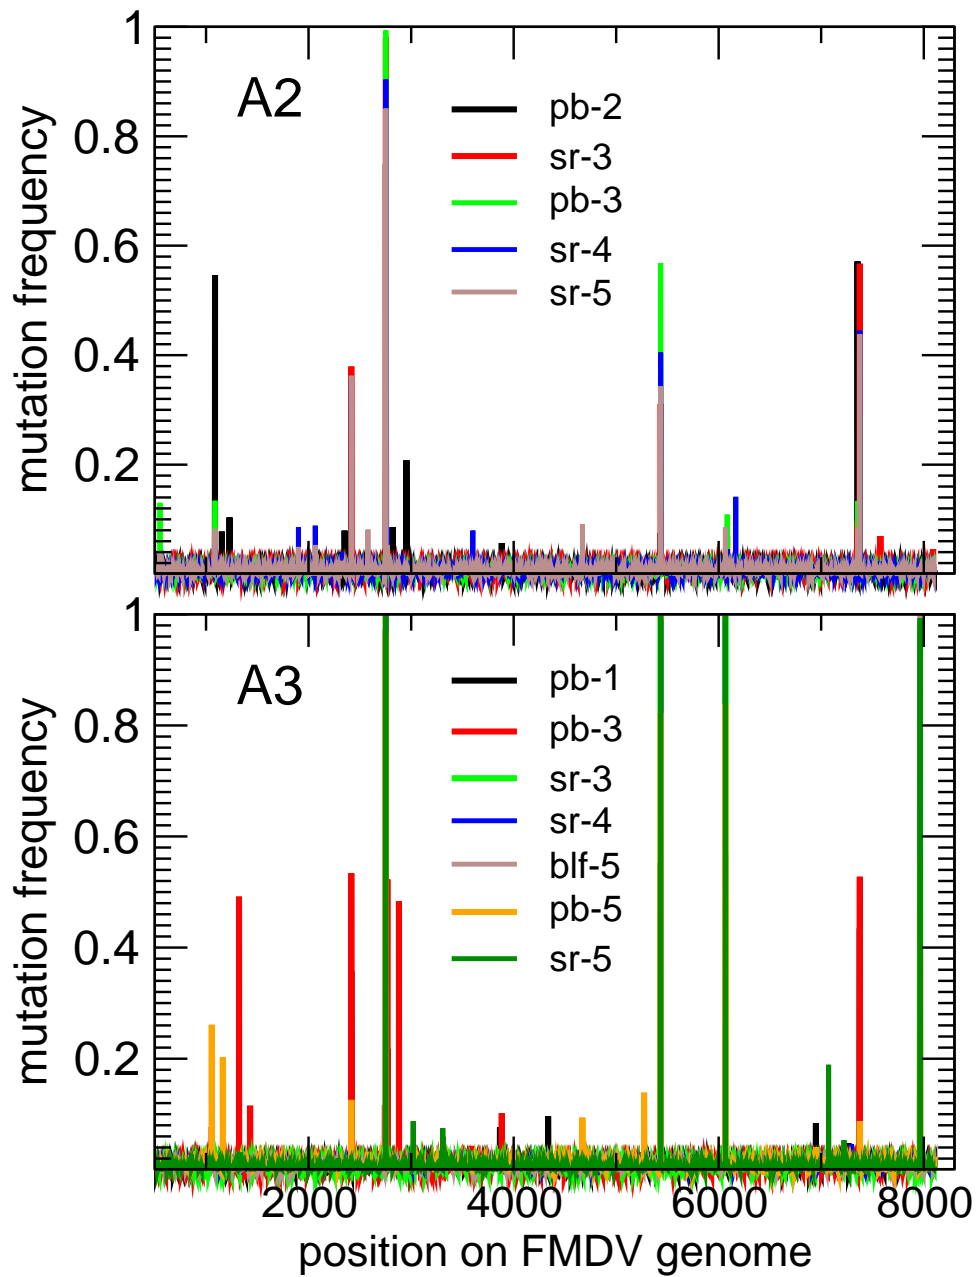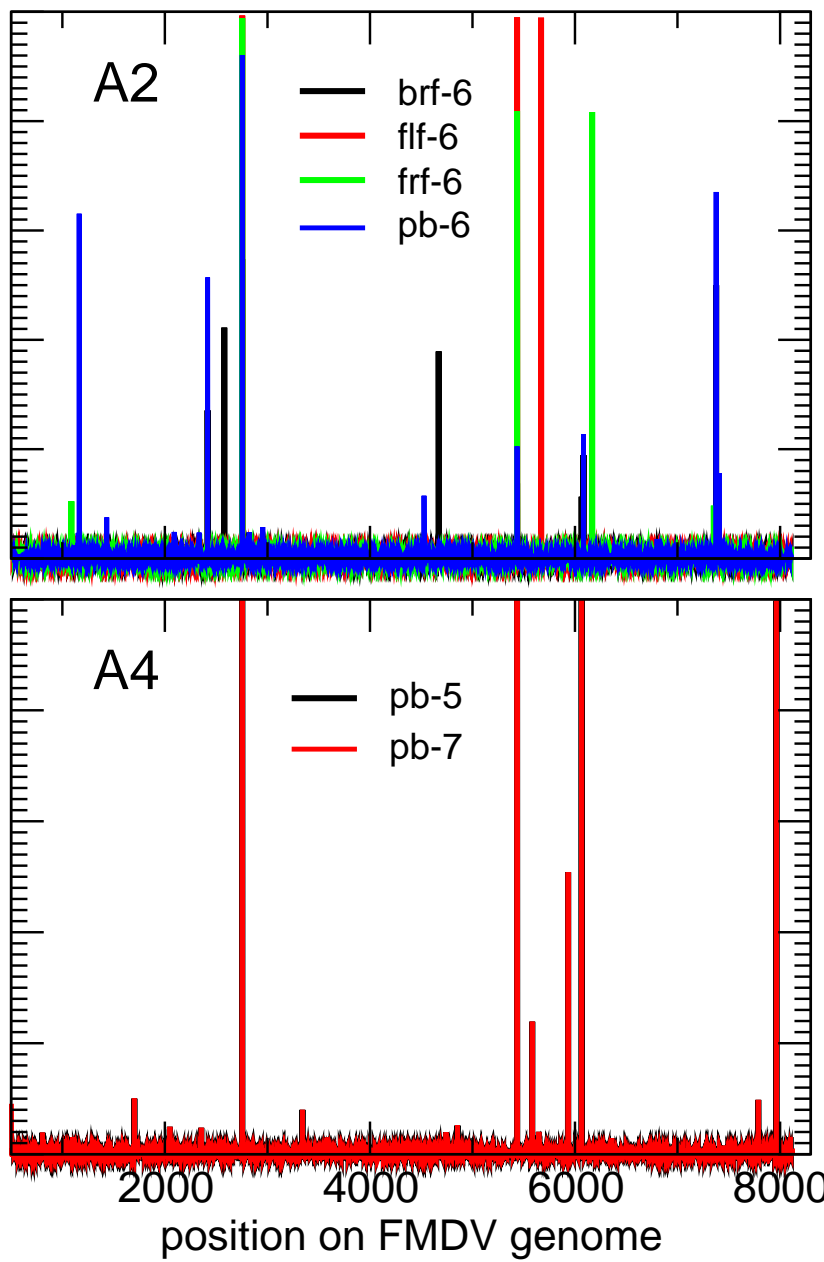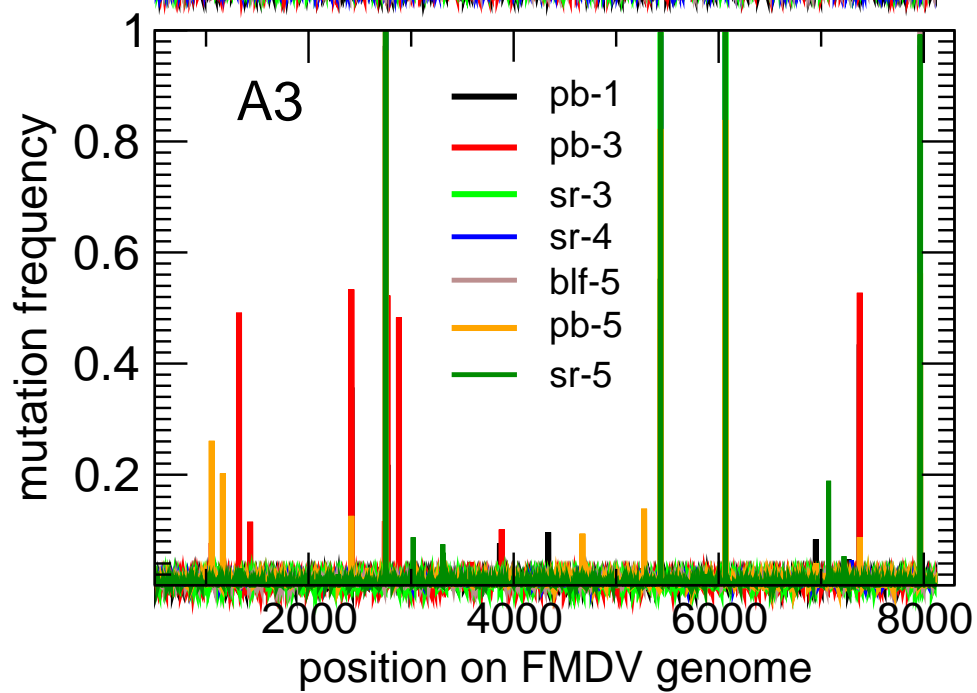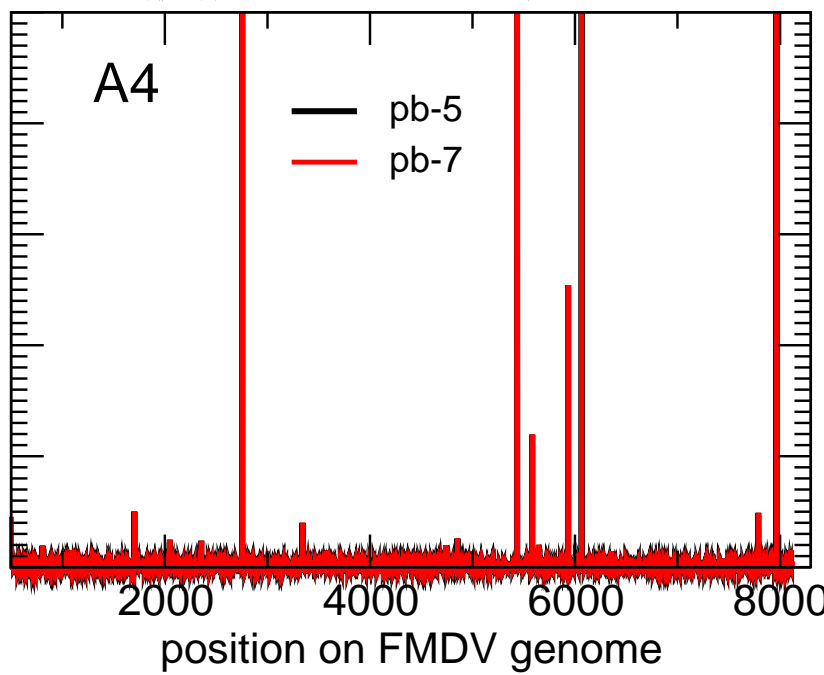

Supplement: 1297-9716-44-12-S4.pdf [file 1297-9716-44-12-S4.pdf]
